# Supplementary material
Source: Research Square preprint supplement (doi:10.21203/rs.3.rs-8697740/v1)
Supplement: Supplementary file 1 [file 88eecefd88ee180a87b2c7a2.xlsx]

## Sheet: 1a
Recombination events	In Recombinant Sequence		Recombinant Sequence(s)	Minor Parental Sequence(s)	Major Parental Sequence(s)	Detection Methods
	Begin	End				RDP	GENECONV	Bootscan	Maxchi	Chimaera	SiSscan	3Seq
1a_1	1112	6473	21ND164_ct	FJ807652.1	Kr_D75_05	5.32497589868547E-310	2.37566e-300	5.16413e-109	1.39521e-59	2.33051e-60	1.87596e-64	2.45895e-10
				IBV_RB86	13AD23TRA_
				Kr_48_4_05	16D88
				AY514485.1	18D108TRA_
				EU817497.1	19ND091
				IBV_H120_1	20L110F
					20L215F
					20L216F
					20ND30
					21L019FCE1
					21L068OPCE
					21L103F
					21ND028CT
					21ND136_tr
					21ND18_ct
					21ND194_tr
					21ND53_ct
					21RI75_28
					22ND03_tra
					22ND06_tra
					22ND09_ct
					22ND119CT
					22ND238tra
					22ND28_tra
					22ND57_TRA
					D85_06_CE
					IBV_R86
					KM91_CE
					Kr_10_04
					Kr_107_04
					Kr_154_04
					Kr_162_04_
					Kr_162_04
					Kr_180_04_
					Kr_31_03
					Kr_343_03
					Kr_62_3_06
					Kr_D15_15_
					Kr_D62_05
					Kr_Q35_06
					Kr_Q43_06
					Kr_Q45_05_
					KU900743.1
					KU900741.1
					JQ977698.1
					IBV_AVR1_1
					IBV_K2_2
1a_2	46	5890	20ND27	18D143CT_4	21L068OPCE	3.54601e-214	5.61935e-210	2.1438e-220	5.84479e-65	3.09588e-23	1.47251e-81	3.68843e-10
				13AQ22TRA_	13AD23TRA_
				18D041CT_3	16D88
				18D042CT_3	19ND091
				18D049CT_3	20L215F
				18D101CT_3	20L216F
				18D288CT_5	20ND066AD6
				19ND157	20ND30
				19ND16	21L019FCE1
				19ND178	21L103F
				19ND79	21L145F
				20AD042Tra	21L350F
				20_CL	21ND028CT
				20L235F	21ND136_tr
				20ND08	21ND18_ct
				20ND12	21ND53_ct
				20ND42	21RI75_28
				20ND71	22ND06_tra
				21L186F	22ND09_ct
				21ND011CT	22ND119CT
				21ND085CT	22ND238tra
				21ND087CT	22ND28_tra
				21ND144_ct	22ND57_TRA
				21ND196_ki	B4_CE
				21RI06_5	D85_06_CE
				21RI07_6	EC91
				21RI100	IBV_R86
				21RI109	KM91_CE
				21RI35	Kr_10_04
				21RI77_29	Kr_107_04
				21RI79_31	Kr_154_04
				21RI85_43	Kr_162_04_
				22ND039	Kr_162_04
				22ND102_42	Kr_180_04_
				22ND114_46	Kr_31_03
				22ND120	Kr_343_03
				22ND259CT	Kr_48_4_05
				22ND263CT	Kr_62_3_06
				22ND307TRA	Kr_D15_15_
				22ND96	Kr_D62_05
				KU900742.1	Kr_D75_05
				KU900738.1	Kr_Q35_06
				KC119407.1	Kr_Q43_06
				KC013541.1	Kr_Q45_05_
				JX840411.1	KU900743.1
					KU900741.1
					JQ977698.1
					IBV_AVR1_1
					IBV_K2_2
1a_3	5674	7714	13AD14TRA_	KU900738.1	Kr_343_03	1.51988e-175	7.04306e-172	1.79899e-100	9.44189e-39	2.4236e-38	1.13983e-39	1.34209e-05
				13AQ22TRA_	13AD23TRA_
				18D040KID_	16D88
				18D041CT_3	17D53
				18D042CT_3	18D108TRA_
				18D049CT_3	18D22
				18D101CT_3	19ND091
				18D143CT_4	20L110F
				18D288CT_5	20L124CL
				19ND157	20L215F
				19ND16	20L216F
				19ND178	20ND30
				19ND181_CE	20ND41
				19ND70	21L019FCE1
				19ND79	21L068OPCE
				20AD042Tra	21L103F
				20_CL	21L145F
				20L235F	21L350F
				20ND026CT	21ND028CT
				20ND039CT	21ND078CT
				20ND08	21ND079CT
				20ND12	21ND136_tr
				20ND42	21ND152_CE
				20ND71	21ND18_ct
				20ND74	21ND19_Tra
				21L034CL	21ND190_ct
				21L050F	21ND192_ct
				21L087OP2	21ND53_ct
				21L186F	21RI102
				21ND011CT	21RI141_54
				21ND034CT	21RI75_28
				21ND046CT	22ND03_tra
				21ND048CT	22ND06_tra
				21ND054CT	22ND09_ct
				21ND056CT	22ND119CT
				21ND060CT	22ND20_ct
				21ND061CT	22ND238tra
				21ND066CT	22ND28_tra
				21ND069CT	22ND57_TRA
				21ND071CT	B4_CE
				21ND074CT	D85_06_CE
				21ND081CT	EC91
				21ND085CT	IBV_R86
				21ND086CT	KM91_CE
				21ND087CT	Kr_10_04
				21ND144_ct	Kr_107_04
				21ND191_ct	Kr_154_04
				21ND196_ki	Kr_162_04_
				21ND216_CE	Kr_162_04
				21ND32_ct	Kr_180_04_
				21RI06_5	Kr_31_03
				21RI07_6	Kr_342_03
				21RI09_7	Kr_343_03_
				21RI100	Kr_354_03
				21RI105	Kr_379_03
				21RI107	Kr_62_3_06
				21RI108	Kr_D15_15_
				21RI109	Kr_D62_05
				21RI116	Kr_D75_05
				21RI14_8	Kr_Q35_06_
				21RI16_9	Kr_Q35_06
				21RI18_10	Kr_Q43_06
				21RI20_11	Kr_Q45_05_
				21RI22_12	KU900743.1
				21RI25	KU900741.1
				21RI30_14	JQ977698.1
				21RI34_15	2_321QXIB0
				21RI35	IBV_AVR1_1
				21RI40_17	IBV_K2_2
				21RI41_18
				21RI46_19
				21RI47_20
				21RI48_21
				21RI51_22
				21RI56_24
				21RI68_26
				21RI71_27
				21RI77_29
				21RI78_30
				21RI79_31
				21RI85_43
				21RI99_32
				22ND039
				22ND044
				22ND100_41
				22ND102_42
				22ND114_46
				22ND116CT_
				22ND118CT_
				22ND120
				22ND259CT
				22ND263CT
				22ND307TRA
				22ND370CT
				22ND57_KID
				22ND81_51
				22ND96
				22ND99_53
				QXE
				KF411041.1
				KU900742.1
				HM245923.1
				KC119407.1
				KC013541.1
				JX840411.1
				HQ848267.1
				JF732903.1
1a_4	10104	11835	21L145F	21RI71_27	22ND238tra	2.34536e-171	1.07514e-169	4.67024e-109	7.16216e-31	8.52162e-30	2.15054e-35	3.68843e-10
				13AQ22TRA_	12AD21TRA_
				18D040KID_	13AD14TRA_
				18D041CT_3	13AD23TRA_
				18D042CT_3	13AD24CT_C
				18D049CT_3	15D44CT_CE
				18D101CT_3	16D88
				18D143CT_4	17D53
				18D288CT_5	18D108TRA_
				19ND157	18D22
				19ND16	19ND091
				19ND178	20L110F
				19ND181_CE	20L216F
				19ND70	20ND066AD6
				19ND79	20ND27
				20AD042Tra	20ND30
				20_CL	20ND41
				20L124CL	21L019FCE1
				20L235F	21L068OPCE
				20ND026CT	21L103F
				20ND039CT	21ND028CT
				20ND08	21ND136_tr
				20ND12	21ND164_ct
				20ND42	21ND18_ct
				20ND71	21ND19_Tra
				20ND74	21ND192_ct
				21L034CL	21ND53_ct
				21L050F	21RI102
				21L087OP2	21RI141_54
				21L186F	21RI75_28
				21ND011CT	22ND03_tra
				21ND034CT	22ND06_tra
				21ND046CT	22ND09_ct
				21ND048CT	22ND119CT
				21ND054CT	22ND20_ct
				21ND056CT	22ND28_tra
				21ND060CT	22ND57_TRA
				21ND061CT	B4_CE
				21ND066CT	D85_06_CE
				21ND069CT	EC91
				21ND071CT	IBV_R86
				21ND074CT	KM91_CE
				21ND081CT	Kr_10_04
				21ND085CT	Kr_107_04
				21ND086CT	Kr_154_04
				21ND087CT	Kr_162_04_
				21ND144_ct	Kr_162_04
				21ND191_ct	Kr_180_04_
				21ND196_ki	Kr_31_03
				21ND216_CE	Kr_342_03
				21ND32_ct	Kr_343_03_
				21RI06_5	Kr_343_03
				21RI07_6	Kr_354_03
				21RI09_7	Kr_379_03
				21RI100	Kr_48_4_05
				21RI105	Kr_62_3_06
				21RI107	Kr_D62_05
				21RI108	Kr_D75_05
				21RI109	Kr_Q35_06_
				21RI116	Kr_Q35_06
				21RI14_8	Kr_Q43_06
				21RI16_9	Kr_Q45_05_
				21RI18_10	AY514485.1
				21RI20_11	KU900743.1
				21RI22_12	KU900741.1
				21RI25	JQ977698.1
				21RI30_14	GU393338.1
				21RI34_15	GU393334.1
				21RI35	2_321QXIB0
				21RI40_17	IBV_AVR1_1
				21RI41_18	IBV_K2_2
				21RI46_19
				21RI47_20
				21RI48_21
				21RI51_22
				21RI56_24
				21RI68_26
				21RI77_29
				21RI78_30
				21RI79_31
				21RI85_43
				21RI99_32
				22ND039
				22ND044
				22ND100_41
				22ND102_42
				22ND114_46
				22ND116CT_
				22ND118CT_
				22ND120
				22ND259CT
				22ND263CT
				22ND307TRA
				22ND370CT
				22ND57_KID
				22ND81_51
				22ND96
				22ND99_53
				QXE
				KF411041.1
				KU900742.1
				KU900738.1
				HM245924.1
				HM245923.1
				KF853202.1
				JX897900.1
				KC119407.1
				KC013541.1
				JX840411.1
				HQ848267.1
				JF732903.1
1a_5	2258	3542	20L110F	19ND157	22ND238tra	7.14524e-146	9.20939e-142	1.08439e-114	3.87588e-29	1.29576e-29	9.48099e-35	3.68843e-10
				13AQ22TRA_	13AD23TRA_
				18D041CT_3	16D88
				18D042CT_3	18D108TRA_
				18D049CT_3	19ND091
				18D101CT_3	20L215F
				18D143CT_4	20L216F
				18D288CT_5	20ND30
				19ND16	21L019FCE1
				19ND178	21L068OPCE
				19ND181_CE	21L103F
				19ND70	21L145F
				19ND79	21ND028CT
				20AD042Tra	21ND136_tr
				20_CL	21ND18_ct
				20L235F	21ND53_ct
				20ND026CT	21RI75_28
				20ND039CT	22ND06_tra
				20ND08	22ND09_ct
				20ND12	22ND119CT
				20ND42	22ND28_tra
				20ND71	22ND57_TRA
				20ND74	D85_06_CE
				21L034CL	IBV_R86
				21L050F	KM91_CE
				21L087OP2	Kr_10_04
				21L186F	Kr_107_04
				21ND011CT	Kr_154_04
				21ND034CT	Kr_162_04_
				21ND046CT	Kr_162_04
				21ND048CT	Kr_180_04_
				21ND054CT	Kr_31_03
				21ND056CT	Kr_343_03
				21ND060CT	Kr_62_3_06
				21ND061CT	Kr_D15_15_
				21ND069CT	Kr_D62_05
				21ND071CT	Kr_D75_05
				21ND074CT	Kr_Q35_06
				21ND081CT	Kr_Q43_06
				21ND085CT	Kr_Q45_05_
				21ND086CT	VNUA_IBV_1
				21ND087CT	KU900743.1
				21ND144_ct	KU900741.1
				21ND191_ct	JQ977698.1
				21ND196_ki	IBV_AVR1_1
				21ND216_CE	IBV_K2_2
				21ND32_ct
				21RI06_5
				21RI07_6
				21RI09_7
				21RI100
				21RI105
				21RI107
				21RI108
				21RI109
				21RI116
				21RI14_8
				21RI16_9
				21RI18_10
				21RI20_11
				21RI22_12
				21RI25
				21RI30_14
				21RI34_15
				21RI35
				21RI40_17
				21RI41_18
				21RI46_19
				21RI47_20
				21RI48_21
				21RI51_22
				21RI56_24
				21RI68_26
				21RI71_27
				21RI77_29
				21RI78_30
				21RI79_31
				21RI85_43
				21RI99_32
				22ND039
				22ND044
				22ND100_41
				22ND102_42
				22ND114_46
				22ND116CT_
				22ND118CT_
				22ND120
				22ND259CT
				22ND263CT
				22ND307TRA
				22ND57_KID
				22ND81_51
				22ND96
				22ND99_53
				IBS_332B
				IBS124
				IBS125
				IBS126
				IBS130
				IBS131
				IBS138
				QXE
				UPM1365
				UPM1371
				KF411041.1
				KU900742.1
				KU900738.1
				HM245924.1
				HM245923.1
				KF853202.1
				JX897900.1
				KC119407.1
				KC013541.1
				JX840411.1
				HQ848267.1
				JF732903.1
1a_6	5204	9238	21RI07_6	18D101CT_3	19ND181_CE	4.7037e-134	3.45947e-129	6.78626e-29	8.6584e-37	2.7802e-37	1.4947e-41	1.22948e-10
				13AQ22TRA_	19ND70
				18D040KID_	20ND026CT
				18D041CT_3	20ND039CT
				18D042CT_3	20ND74
				18D049CT_3	21L034CL
				18D143CT_4	21L050F
				18D288CT_5	21L186F
				19ND157	21ND046CT
				19ND16	21ND048CT
				19ND178	21ND054CT
				20ND71	21ND056CT
				KU900742.1	21ND060CT
				KU900738.1	21ND066CT
					21ND069CT
					21ND071CT
					21ND081CT
					21ND085CT
					21ND087CT
					21ND144_ct
					21ND191_ct
					21ND196_ki
					21ND32_ct
					21RI06_5
					21RI09_7
					21RI105
					21RI107
					21RI108
					21RI109
					21RI116
					21RI16_9
					21RI18_10
					21RI20_11
					21RI22_12
					21RI25
					21RI30_14
					21RI47_20
					21RI48_21
					21RI68_26
					21RI71_27
					21RI78_30
					21RI79_31
					21RI85_43
					21RI99_32
					22ND044
					22ND100_41
					22ND118CT_
					22ND120
					22ND307TRA
					22ND57_KID
					22ND96
					22ND99_53
1a_7	6464	7555	21L350F	18D040KID_	20L216F	3.18514e-121	1.69896e-117	2.05552e-114	2.39612e-28	9.1098e-29	6.85243e-29	8.71004e-05
				13AQ22TRA_	16D88
				18D041CT_3	17D53
				18D042CT_3	18D22
				18D049CT_3	19ND091
				18D101CT_3	20L110F
				18D143CT_4	20L124CL
				18D288CT_5	20L215F
				19ND157	20ND30
				19ND16	20ND41
				19ND178	21L019FCE1
				19ND181_CE	21L068OPCE
				19ND70	21L103F
				19ND79	21L145F
				20AD042Tra	21ND028CT
				20_CL	21ND078CT
				20L235F	21ND079CT
				20ND026CT	21ND152_CE
				20ND039CT	21ND18_ct
				20ND08	21ND19_Tra
				20ND12	21ND190_ct
				20ND42	21ND192_ct
				20ND71	21ND53_ct
				20ND74	21RI141_54
				21L034CL	21RI75_28
				21L050F	22ND03_tra
				21L087OP2	22ND119CT
				21L186F	22ND20_ct
				21ND034CT	22ND238tra
				21ND046CT	22ND28_tra
				21ND048CT	D85_06_CE
				21ND054CT	Kr_10_04
				21ND056CT	Kr_107_04
				21ND060CT	Kr_154_04
				21ND061CT	Kr_162_04_
				21ND066CT	Kr_162_04
				21ND069CT	Kr_180_04_
				21ND071CT	Kr_31_03
				21ND074CT	Kr_342_03
				21ND081CT	Kr_343_03_
				21ND085CT	Kr_343_03
				21ND086CT	Kr_354_03
				21ND087CT	Kr_379_03
				21ND144_ct	Kr_62_3_06
				21ND191_ct	Kr_D15_15_
				21ND196_ki	Kr_D62_05
				21ND216_CE	Kr_D75_05
				21ND32_ct	Kr_Q35_06_
				21RI06_5	Kr_Q35_06
				21RI09_7	Kr_Q43_06
				21RI100	Kr_Q45_05_
				21RI105	KU900743.1
				21RI107	KU900741.1
				21RI108	2_321QXIB0
				21RI109	IBV_AVR1_1
				21RI116
				21RI14_8
				21RI16_9
				21RI18_10
				21RI20_11
				21RI22_12
				21RI25
				21RI30_14
				21RI34_15
				21RI40_17
				21RI41_18
				21RI46_19
				21RI47_20
				21RI48_21
				21RI51_22
				21RI56_24
				21RI68_26
				21RI71_27
				21RI78_30
				21RI79_31
				21RI85_43
				21RI99_32
				22ND044
				22ND100_41
				22ND116CT_
				22ND118CT_
				22ND120
				22ND307TRA
				22ND57_KID
				22ND81_51
				22ND96
				22ND99_53
				QXE
				KU900742.1
				KU900738.1
				HM245923.1
				KC119407.1
				KC013541.1
				JX840411.1
1a_8	10695	12450	21L081F	21ND164_ct	21RI18_10	3.99007e-119	6.51972e-116	1.07188e-112	1.82224e-28	1.16104e-28	2.36864e-34	2.45895e-10
				13AD23TRA_	13AQ22TRA_
				16D88	18D040KID_
				18D108TRA_	18D041CT_3
				19ND091	18D042CT_3
				20L110F	18D049CT_3
				20L216F	18D101CT_3
				20ND27	18D143CT_4
				21L068OPCE	18D288CT_5
				21L103F	19ND157
				21ND136_tr	19ND178
				21ND18_ct	19ND181_CE
				21ND53_ct	19ND70
				21RI102	19ND79
				21RI75_28	20AD042Tra
				22ND06_tra	20_CL
				22ND075KID	20L235F
				22ND09_ct	20ND026CT
				22ND57_TRA	20ND039CT
				B4_CE	20ND08
				D85_06_CE	20ND42
				EC91	20ND71
				IBV_R86	21L034CL
				KM91_CE	21L186F
				Kr_10_04	21ND011CT
				Kr_107_04	21ND048CT
				Kr_154_04	21ND056CT
				Kr_162_04_	21ND060CT
				Kr_162_04	21ND061CT
				Kr_180_04_	21ND066CT
				Kr_D75_05	21ND071CT
				Kr_Q45_05_	21ND074CT
				JQ977698.1	21ND081CT
				IBV_AVR1_1	21ND086CT
				IBV_K2_2	21ND191_ct
					21ND196_ki
					21ND32_ct
					21RI06_5
					21RI07_6
					21RI100
					21RI105
					21RI14_8
					21RI16_9
					21RI20_11
					21RI22_12
					21RI25
					21RI30_14
					21RI34_15
					21RI35
					21RI41_18
					21RI46_19
					21RI47_20
					21RI48_21
					21RI51_22
					21RI52_23
					21RI68_26
					21RI71_27
					21RI77_29
					21RI78_30
					21RI99_32
					22ND039
					22ND102_42
					22ND114_46
					22ND116CT_
					22ND259CT
					22ND263CT
					22ND370CT
					22ND81_51
					22ND96
					KU900742.1
					KU900738.1
					HM245923.1
					JF732903.1
1a_9	1854	5038	IBS124	HM245923.1	UPM1429	2.1611e-104	3.64899e-103	NS	6.15502e-31	1.01839e-29	5.24035e-48	2.45895e-10
				13AQ22TRA_	20L110F
				18D041CT_3	20L215F
				18D042CT_3	20L216F
				18D049CT_3	20ND30
				18D101CT_3	21L019FCE1
				18D143CT_4	21L068OPCE
				18D288CT_5	21L145F
				19ND157	21L350F
				19ND16	21ND028CT
				19ND178	22ND119CT
				19ND181_CE	22ND238tra
				19ND70	22ND28_tra
				19ND79	Kr_31_03
				20AD042Tra	Kr_343_03
				20_CL	Kr_Q35_06
				20L235F	Kr_Q45_05_
				20ND026CT	UPM1416
				20ND039CT	JQ088078.1
				20ND08	KU900743.1
				20ND12	KF377577.1
				20ND42
				20ND71
				20ND74
				21L034CL
				21L050F
				21L087OP2
				21L186F
				21ND011CT
				21ND034CT
				21ND046CT
				21ND048CT
				21ND054CT
				21ND056CT
				21ND060CT
				21ND061CT
				21ND069CT
				21ND071CT
				21ND074CT
				21ND081CT
				21ND085CT
				21ND086CT
				21ND087CT
				21ND144_ct
				21ND191_ct
				21ND196_ki
				21ND216_CE
				21ND32_ct
				21RI06_5
				21RI07_6
				21RI09_7
				21RI100
				21RI105
				21RI107
				21RI108
				21RI109
				21RI116
				21RI14_8
				21RI16_9
				21RI18_10
				21RI20_11
				21RI22_12
				21RI25
				21RI30_14
				21RI34_15
				21RI35
				21RI40_17
				21RI41_18
				21RI46_19
				21RI47_20
				21RI48_21
				21RI51_22
				21RI56_24
				21RI68_26
				21RI71_27
				21RI77_29
				21RI78_30
				21RI79_31
				21RI85_43
				21RI99_32
				22ND039
				22ND044
				22ND100_41
				22ND102_42
				22ND114_46
				22ND116CT_
				22ND118CT_
				22ND120
				22ND259CT
				22ND307TRA
				22ND57_KID
				22ND81_51
				22ND96
				22ND99_53
				QXE
				KF411041.1
				KU900742.1
				KU900738.1
				KF853202.1
				JX897900.1
				KC119407.1
				KC013541.1
				JX840411.1
				HQ848267.1
				JF732903.1
1a_10	10060	13426	KU900743.1	FJ807652.1	KU900741.1	2.15191e-93	2.23263e-90	2.08177e-92	8.38925e-23	6.00724e-23	2.02186e-27	3.68843e-10
				IBV_RB86	12AD21TRA_
				IBV_H120_1	13AD14TRA_
					13AD23TRA_
					13AD24CT_C
					15D44CT_CE
					17D53
					18D22
					20L216F
					20ND066AD6
					20ND27
					20ND30
					20ND41
					21L019FCE1
					21L068OPCE
					21L103F
					21ND028CT
					21ND136_tr
					21ND164_ct
					21ND18_ct
					21ND19_Tra
					21ND192_ct
					21ND53_ct
					21RI102
					21RI141_54
					21RI75_28
					22ND06_tra
					22ND09_ct
					22ND119CT
					22ND20_ct
					22ND238tra
					22ND57_TRA
					B4_CE
					D85_06_CE
					EC91
					IBV_R86
					KM91_CE
					Kr_107_04
					Kr_154_04
					Kr_180_04_
					Kr_31_03
					Kr_342_03
					Kr_343_03_
					Kr_343_03
					Kr_354_03
					Kr_379_03
					Kr_48_4_05
					Kr_62_3_06
					Kr_D15_15_
					Kr_D75_05
					Kr_Q35_06_
					Kr_Q35_06
					Kr_Q43_06
					Kr_Q45_05_
					JQ977698.1
					2_321QXIB0
					IBV_AVR1_1
					IBV_K2_2
1a_11	4297	7354	Kr_48_4_05	FJ807652.1	EC91	1.50754e-40	2.228e-92	7.1599e-96	2.02963e-19	8.93515e-21	1.8888e-51	1.22948e-10
				IBV_RB86
				AY514485.1
				EU817497.1
				IBV_H120_1
1a_12	1402	3018	EU637854.1	UPM1429	DQ646405.2	3.20521e-72	1.79087e-89	NS	1.32804e-25	1.86389e-25	5.33196e-38	2.45895e-10
				UPM1416
1a_13	5204	7272	21RI14_8	19ND157	19ND181_CE	1.63598e-67	6.79009e-65	1.1736e-08	1.63787e-20	6.60805e-21	1.98071e-37	1.22948e-10
				13AQ22TRA_	19ND70
				18D040KID_	19ND79
				18D041CT_3	20AD042Tra
				18D042CT_3	20_CL
				18D049CT_3	20ND026CT
				18D101CT_3	20ND039CT
				18D143CT_4	20ND08
				18D288CT_5	20ND12
				19ND16	20ND42
				19ND178	20ND74
				20ND71	21L034CL
				KU900742.1	21L050F
				KU900738.1	21L186F
				KC119407.1	21ND034CT
				KC013541.1	21ND046CT
				JX840411.1	21ND048CT
					21ND054CT
					21ND056CT
					21ND060CT
					21ND066CT
					21ND069CT
					21ND071CT
					21ND081CT
					21ND085CT
					21ND087CT
					21ND144_ct
					21ND191_ct
					21ND196_ki
					21ND32_ct
					21RI06_5
					21RI09_7
					21RI105
					21RI107
					21RI108
					21RI109
					21RI116
					21RI16_9
					21RI18_10
					21RI20_11
					21RI22_12
					21RI25
					21RI30_14
					21RI47_20
					21RI48_21
					21RI56_24
					21RI68_26
					21RI71_27
					21RI78_30
					21RI79_31
					21RI85_43
					21RI99_32
					22ND044
					22ND100_41
					22ND118CT_
					22ND120
					22ND307TRA
					22ND57_KID
					22ND96
					22ND99_53
1a_14	10695	12796	20AD17	KF411041.1	13AD24CT_C	5.48036e-62	9.09431e-54	5.31934e-57	3.77045e-27	0.0295509	1.90758e-24	2.45895e-10
				19ND181_CE	12AD21TRA_
				19ND70	13AD14TRA_
				20ND026CT	15D44CT_CE
				20ND039CT	20ND066AD6
				21L034CL	21RI102
				21L050F	B4_CE
				21ND011CT	EC91
				21ND034CT	GQ504724.1
				21ND046CT	GU393338.1
				21ND056CT	GU393336.1
				21ND060CT	GU393334.1
				21ND061CT	DQ001339.1
				21ND069CT	DQ001338.1
				21ND071CT	DQ834384.1
				21ND081CT	NC_001451.
				21ND32_ct
				21RI07_6
				21RI105
				21RI107
				21RI14_8
				21RI16_9
				21RI18_10
				21RI20_11
				21RI22_12
				21RI25
				21RI30_14
				21RI34_15
				21RI35
				21RI47_20
				21RI48_21
				21RI56_24
				21RI71_27
				21RI77_29
				21RI99_32
				22ND96
				QXE
				HM245923.1
				KF853202.1
				JX897900.1
				HQ848267.1
				JF732903.1
				AY319651.1

## Sheet: 1b
Recombination events	In Recombinant Sequence		Recombinant Sequence(s)	Minor Parental Sequence(s)	Major Parental Sequence(s)	Detection Methods
	Begin	End				RDP	GENECONV	Bootscan	Maxchi	Chimaera	SiSscan	3Seq
1b_1	12467	23052	21L145F	21RI25	21ND194_tr	1.09427042624728E-317	1.79066e-300	8.47416e-124	8.72364e-70	4.70427e-49	3.71794e-112	1.22948e-10
				13AQ22TRA_
				18D040KID_
				18D041CT_3
				18D042CT_3
				18D049CT_3
				18D101CT_3
				18D143CT_4
				18D288CT_5
				19ND157
				19ND16
				19ND178
				19ND181_CE
				19ND70
				19ND79
				20AD042Tra
				20_CL
				20L235F
				20ND026CT
				20ND039CT
				20ND08
				20ND12
				20ND42
				21L034CL
				21L081F
				21L087OP2
				21L186F
				21ND011CT
				21ND034CT
				21ND048CT
				21ND056CT
				21ND060CT
				21ND061CT
				21ND066CT
				21ND069CT
				21ND071CT
				21ND074CT
				21ND081CT
				21ND085CT
				21ND086CT
				21ND087CT
				21ND144_ct
				21ND191_ct
				21ND196_ki
				21ND32_ct
				21RI06_5
				21RI07_6
				21RI100
				21RI105
				21RI108
				21RI109
				21RI16_9
				21RI18_10
				21RI20_11
				21RI22_12
				21RI30_14
				21RI34_15
				21RI35
				21RI40_17
				21RI41_18
				21RI46_19
				21RI47_20
				21RI48_21
				21RI51_22
				21RI52_23
				21RI56_24
				21RI68_26
				21RI71_27
				21RI77_29
				21RI78_30
				21RI79_31
				21RI99_32
				22ND039
				22ND102_42
				22ND114_46
				22ND116CT_
				22ND259CT
				22ND263CT
				22ND370CT
				22ND81_51
				22ND96
				QXE
				KF411041.1
				KU900742.1
				KU900738.1
				HM245924.1
				HM245923.1
				KF853202.1
				KC119407.1
				KC013541.1
				JX840411.1
				HQ848267.1
				JF732903.1
1b_2	15502	19475	21RI116	20ND30	21ND048CT	2.46971e-303	3.06115e-300	4.55921e-234	1.24813e-46	2.39724e-48	2.24657e-55	7.37686e-10
				21L019FCE1	13AQ22TRA_
				21L068OPCE	18D041CT_3
				21ND164_ct	18D042CT_3
				21ND18_ct	18D049CT_3
				21ND53_ct	18D101CT_3
				21RI75_28	18D143CT_4
				22ND119CT	18D288CT_5
				22ND238tra	19ND157
				D85_06_CE	19ND16
				IBV_R86	19ND178
				KM91_CE	19ND181_CE
				Kr_107_04	19ND70
				Kr_154_04	19ND79
				Kr_180_04_	20AD042Tra
				Kr_31_03	20_CL
				Kr_343_03	20L235F
				Kr_48_4_05	20ND026CT
				Kr_62_3_06	20ND039CT
				Kr_D75_05	20ND08
				Kr_Q35_06	20ND12
				Kr_Q43_06	20ND42
				Kr_Q45_05_	20ND74
				KU900743.1	21L034CL
				KU900741.1	21L050F
				JQ977698.1	21L087OP2
				IBV_AVR1_1	21L186F
					21ND011CT
					21ND034CT
					21ND046CT
					21ND054CT
					21ND056CT
					21ND060CT
					21ND061CT
					21ND069CT
					21ND071CT
					21ND074CT
					21ND081CT
					21ND085CT
					21ND086CT
					21ND087CT
					21ND144_ct
					21ND191_ct
					21ND196_ki
					21ND216_CE
					21ND32_ct
					21RI06_5
					21RI07_6
					21RI09_7
					21RI100
					21RI105
					21RI107
					21RI108
					21RI109
					21RI14_8
					21RI16_9
					21RI18_10
					21RI20_11
					21RI22_12
					21RI25
					21RI30_14
					21RI35
					21RI40_17
					21RI41_18
					21RI46_19
					21RI47_20
					21RI48_21
					21RI51_22
					21RI56_24
					21RI68_26
					21RI77_29
					21RI78_30
					21RI79_31
					21RI85_43
					21RI99_32
					22ND039
					22ND044
					22ND100_41
					22ND102_42
					22ND114_46
					22ND116CT_
					22ND118CT_
					22ND120
					22ND259CT
					22ND263CT
					22ND307TRA
					22ND57_KID
					22ND81_51
					22ND96
					22ND99_53
					QXE
					KF411041.1
					KU900742.1
					KU900738.1
					HM245924.1
					HM245923.1
					KF853202.1
					JX897900.1
					KC119407.1
					KC013541.1
					JX840411.1
					HQ848267.1
					JF732903.1
1b_3	9091	18359	21ND190_ct	19ND181_CE	21RI102	1.16454e-232	3.6295e-301	1.08727e-217	2.07657e-74	1.27766e-74	6.07265e-61	4.91791e-10
				18D040KID_	12AD21TRA_
				18D288CT_5	13AD14TRA_
				19ND178	15D44CT_CE
				19ND70	20L216F
				19ND79	20ND30
				20AD042Tra	20ND41
				20_CL	21L019FCE1
				20ND026CT	21L103F
				20ND039CT	21ND028CT
				20ND08	21ND19_Tra
				20ND12	21ND192_ct
				20ND42	21RI141_54
				20ND74	22ND119CT
				21L034CL	22ND20_ct
				21L050F	22ND238tra
				21L087OP2	22ND28_tra
				21L186F	IBV_RB86
				21ND011CT	Kr_107_04
				21ND034CT	Kr_154_04
				21ND046CT	Kr_180_04_
				21ND048CT	Kr_31_03
				21ND054CT	Kr_343_03
				21ND056CT	Kr_48_4_05
				21ND060CT	Kr_62_3_06
				21ND061CT	Kr_D15_15_
				21ND066CT	Kr_Q35_06
				21ND069CT	Kr_Q43_06
				21ND071CT	Kr_Q45_05_
				21ND074CT	UPM1416
				21ND081CT	UPM1429
				21ND085CT	VNUA_IBV_1
				21ND086CT	AY514485.1
				21ND087CT	KU900743.1
				21ND191_ct	KU900741.1
				21ND196_ki	GU393336.1
				21ND216_CE	EU817497.1
				21ND32_ct	FJ807652.1
				21RI06_5	2_321QXIB0
				21RI07_6
				21RI09_7
				21RI100
				21RI105
				21RI107
				21RI108
				21RI109
				21RI14_8
				21RI16_9
				21RI18_10
				21RI20_11
				21RI22_12
				21RI25
				21RI30_14
				21RI34_15
				21RI35
				21RI40_17
				21RI41_18
				21RI46_19
				21RI47_20
				21RI48_21
				21RI51_22
				21RI68_26
				21RI71_27
				21RI77_29
				21RI78_30
				21RI79_31
				21RI85_43
				21RI99_32
				22ND039
				22ND044
				22ND100_41
				22ND102_42
				22ND114_46
				22ND116CT_
				22ND118CT_
				22ND120
				22ND259CT
				22ND263CT
				22ND370CT
				22ND57_KID
				22ND81_51
				22ND96
				22ND99_53
				KF411041.1
				HM245924.1
				KF853202.1
				JX897900.1
				KC119407.1
				KC013541.1
				JX840411.1
1b_4	10052	19046	EU817497.1	DQ834384.1	FJ807652.1	1.95758e-206	5.66693e-194	2.07494e-200	7.97118e-60	1.64357e-59	1.19849e-59	3.68843e-10
				GQ504724.1
1b_5	10689	15153	20AD049CE2	20ND066AD6	21L034CL	1.29472e-204	2.10458e-206	2.76586e-216	8.13495e-49	1.22098e-48	5.19432e-62	1.22948e-10
					13AQ22TRA_
					18D042CT_3
					18D143CT_4
					19ND157
					19ND181_CE
					19ND70
					20AD042Tra
					20_CL
					20L235F
					20ND026CT
					20ND039CT
					20ND08
					20ND12
					20ND42
					20ND71
					20ND74
					21L050F
					21L081F
					21L186F
					21ND011CT
					21ND034CT
					21ND046CT
					21ND048CT
					21ND054CT
					21ND056CT
					21ND060CT
					21ND061CT
					21ND066CT
					21ND069CT
					21ND071CT
					21ND081CT
					21ND085CT
					21ND087CT
					21ND144_ct
					21ND191_ct
					21ND216_CE
					21ND32_ct
					21RI06_5
					21RI07_6
					21RI09_7
					21RI105
					21RI108
					21RI109
					21RI14_8
					21RI16_9
					21RI18_10
					21RI20_11
					21RI22_12
					21RI25
					21RI30_14
					21RI34_15
					21RI35
					21RI47_20
					21RI48_21
					21RI56_24
					21RI68_26
					21RI71_27
					21RI77_29
					21RI78_30
					21RI79_31
					21RI85_43
					21RI99_32
					22ND039
					22ND044
					22ND100_41
					22ND102_42
					22ND114_46
					22ND118CT_
					22ND120
					22ND236tra
					22ND259CT
					22ND263CT
					22ND370CT
					22ND57_KID
					22ND96
					22ND99_53
					KU900742.1
					KU900738.1
					HM245923.1
					KF853202.1
					KC119407.1
					KC013541.1
1b_6	16152	17731	21L034CL	IBV_K2_2	21RI18_10	7.96863e-187	1.58357e-184	5.32703e-99	7.04506e-26	6.99287e-26	1.4265e-28	8.60634e-10
				12AD21TRA_	18D042CT_3
				13AD14TRA_	18D143CT_4
				13AD23TRA_	19ND181_CE
				13AD24CT_C	19ND70
				15D44CT_CE	20AD042Tra
				17D53	20_CL
				18D22	20ND026CT
				20L215F	20ND039CT
				20L216F	20ND08
				20ND30	20ND12
				20ND41	20ND42
				21L019FCE1	21L050F
				21L068OPCE	21L081F
				21L103F	21L186F
				21ND028CT	21ND011CT
				21ND136_tr	21ND034CT
				21ND164_ct	21ND046CT
				21ND18_ct	21ND048CT
				21ND19_Tra	21ND056CT
				21ND192_ct	21ND060CT
				21ND53_ct	21ND061CT
				21RI102	21ND066CT
				21RI141_54	21ND069CT
				21RI75_28	21ND081CT
				22ND06_tra	21ND085CT
				22ND09_ct	21ND087CT
				22ND119CT	21ND144_ct
				22ND20_ct	21ND191_ct
				22ND238tra	21ND32_ct
				22ND28_tra	21RI06_5
				22ND57_TRA	21RI07_6
				B4_CE	21RI105
				D85_06_CE	21RI107
				EC91	21RI108
				IBV_R86	21RI109
				IBV_RB86	21RI14_8
				KM91_CE	21RI16_9
				Kr_107_04	21RI20_11
				Kr_154_04	21RI22_12
				Kr_180_04_	21RI25
				Kr_31_03	21RI30_14
				Kr_342_03	21RI34_15
				Kr_343_03_	21RI35
				Kr_343_03	21RI48_21
				Kr_354_03	21RI56_24
				Kr_379_03	21RI68_26
				Kr_48_4_05	21RI71_27
				Kr_62_3_06	21RI77_29
				Kr_D15_15_	21RI78_30
				Kr_D75_05	21RI79_31
				Kr_Q35_06_	21RI99_32
				Kr_Q35_06	22ND102_42
				Kr_Q43_06	22ND114_46
				Kr_Q45_05_	22ND259CT
				KU900743.1	22ND263CT
				KU900741.1	22ND307TRA
				JQ977698.1	HM245923.1
				2_321QXIB0	KF853202.1
				IBV_AVR1_1	JX897900.1
1b_7	17700	19340	20L235F	21ND028CT	19ND79	3.86442e-123	7.73318e-99	5.26672e-111	2.86377e-24	1.7511e-25	1.75727e-26	8.60634e-10
				13AD23TRA_	13AQ22TRA_
				20AD17	18D040KID_
				21L019FCE1	18D041CT_3
				21L068OPCE	18D042CT_3
				21ND136_tr	18D049CT_3
				22ND06_tra	18D101CT_3
				22ND075KID	18D143CT_4
				22ND09_ct	18D288CT_5
				22ND28_tra	19ND157
				22ND57_TRA	19ND16
				Kr_343_03	19ND178
				KU900743.1	19ND181_CE
				IBV_K2_2	19ND70
					20AD042Tra
					20_CL
					20ND026CT
					20ND039CT
					20ND08
					20ND12
					20ND42
					20ND74
					21L050F
					21L081F
					21L087OP2
					21L186F
					21ND011CT
					21ND034CT
					21ND046CT
					21ND054CT
					21ND056CT
					21ND060CT
					21ND061CT
					21ND069CT
					21ND071CT
					21ND074CT
					21ND081CT
					21ND085CT
					21ND086CT
					21ND087CT
					21ND144_ct
					21ND196_ki
					21ND216_CE
					21ND32_ct
					21RI06_5
					21RI07_6
					21RI09_7
					21RI100
					21RI105
					21RI107
					21RI109
					21RI14_8
					21RI16_9
					21RI18_10
					21RI20_11
					21RI22_12
					21RI25
					21RI30_14
					21RI34_15
					21RI35
					21RI40_17
					21RI41_18
					21RI46_19
					21RI47_20
					21RI48_21
					21RI51_22
					21RI52_23
					21RI56_24
					21RI71_27
					21RI77_29
					21RI79_31
					21RI85_43
					21RI99_32
					22ND039
					22ND044
					22ND100_41
					22ND102_42
					22ND114_46
					22ND116CT_
					22ND118CT_
					22ND120
					22ND236tra
					22ND259CT
					22ND263CT
					22ND307TRA
					22ND57_KID
					22ND81_51
					22ND96
					22ND99_53
					QXE
					KU900742.1
					KU900738.1
					HM245924.1
					HM245923.1
					KF853202.1
					JX840411.1
					HQ848267.1
					JF732903.1
					AY319651.1
1b_8	9082	19323	HM245924.1	KF411041.1	JF893452.2	9.52034e-55	1.93859e-113	9.47511e-60	2.03691e-41	2.47004e-42	2.56012e-46	2.45895e-10
				21L087OP2	EU714029.1
				21ND071CT
				QXE
1b_9	11404	19475	22ND28_tra	13AD23TRA_	22ND119CT	2.91041e-108	1.20295e-100	1.40387e-07	6.02157e-38	1.11648e-37	3.72121e-41	1.22948e-10
				21ND136_tr	20ND30
				22ND06_tra	22ND238tra
				22ND09_ct
				22ND57_TRA
				IBV_K2_2
1b_10	13700	15486	20ND27	18D040KID_	21L103F	9.81256e-107	2.29321e-102	1.61591e-86	3.31875e-24	1.47633e-24	2.15214e-29	3.68843e-10
				13AQ22TRA_	12AD21TRA_
				18D041CT_3	13AD14TRA_
				18D049CT_3	13AD24CT_C
				18D101CT_3	17D53
				18D288CT_5	20L215F
				19ND157	20L216F
				19ND16	20ND066AD6
				19ND178	21ND18_ct
				19ND181_CE	21ND53_ct
				19ND70	21RI102
				19ND79	21RI75_28
				20_CL	D85_06_CE
				20L235F	Kr_154_04
				20ND026CT	Kr_31_03
				20ND039CT	Kr_342_03
				20ND74	Kr_343_03_
				21L050F	Kr_343_03
				21L081F	Kr_354_03
				21L087OP2	Kr_379_03
				21L186F	Kr_D75_05
				21ND011CT	KU900743.1
				21ND046CT	IBV_AVR1_1
				21ND054CT
				21ND056CT
				21ND060CT
				21ND061CT
				21ND069CT
				21ND071CT
				21ND074CT
				21ND081CT
				21ND085CT
				21ND086CT
				21ND087CT
				21ND196_ki
				21ND216_CE
				21ND32_ct
				21RI06_5
				21RI07_6
				21RI09_7
				21RI100
				21RI105
				21RI107
				21RI14_8
				21RI16_9
				21RI18_10
				21RI20_11
				21RI22_12
				21RI25
				21RI30_14
				21RI34_15
				21RI35
				21RI40_17
				21RI41_18
				21RI46_19
				21RI47_20
				21RI48_21
				21RI51_22
				21RI52_23
				21RI71_27
				21RI77_29
				21RI85_43
				21RI99_32
				22ND044
				22ND100_41
				22ND116CT_
				22ND118CT_
				22ND120
				22ND236tra
				22ND307TRA
				22ND57_KID
				22ND81_51
				22ND96
				22ND99_53
				QXE
				KF411041.1
				KU900742.1
				KU900738.1
				KC119407.1
				KC013541.1
				JX840411.1
				HQ848267.1
				JF732903.1
1b_11	11820	19476	20_CL	21RI14_8	20ND08	1.11749e-102	3.6249e-98	4.48302e-36	1.47881e-37	3.4237e-37	3.40726e-34	1.22948e-10
				19ND181_CE	20AD042Tra
				19ND70	20ND12
				20ND026CT	20ND42
				20ND039CT	21ND144_ct
				21L034CL	21RI109
				21L050F
				21ND011CT
				21ND046CT
				21ND048CT
				21ND056CT
				21ND060CT
				21ND061CT
				21ND069CT
				21ND071CT
				21ND081CT
				21ND191_ct
				21ND32_ct
				21RI07_6
				21RI105
				21RI107
				21RI108
				21RI16_9
				21RI18_10
				21RI20_11
				21RI22_12
				21RI25
				21RI30_14
				21RI34_15
				21RI35
				21RI47_20
				21RI48_21
				21RI68_26
				21RI71_27
				21RI78_30
				21RI99_32
1b_12	15793	18977	IBV_RB86	Kr_31_03	IBV_H120_1	1.50001e-79	1.28146e-56	4.76476e-62	4.23557e-26	7.75635e-25	3.54973e-17	3.68843e-10
				13AD23TRA_	FJ807652.1
				18D22
				20ND30
				21L019FCE1
				21L068OPCE
				21ND028CT
				21ND136_tr
				22ND06_tra
				22ND09_ct
				22ND119CT
				22ND238tra
				22ND57_TRA
				IBV_R86
				KM91_CE
				Kr_107_04
				Kr_180_04_
				Kr_343_03
				Kr_62_3_06
				Kr_Q35_06_
				Kr_Q35_06
				Kr_Q43_06
				Kr_Q45_05_
				KU900743.1
				KU900741.1
				JQ977698.1
				IBV_K2_2
1b_13	15808	19476	22ND102_42	20ND42	21RI77_29	3.15879e-72	7.08271e-70	2.53165e-70	7.64335e-26	4.75712e-27	3.44253e-29	2.07943e-31
				20AD042Tra	19ND181_CE
				20ND08	20ND026CT
				20ND12	20ND039CT
				21ND034CT	21ND081CT
				21ND144_ct	21RI107
				21RI109	21RI99_32
				21RI56_24
				21RI79_31
1b_14	15296	19362	19ND178	22ND118CT_	18D042CT_3	1.19359e-38	8.23542e-49	2.9688e-58	4.35998e-14	1.86259e-26	1.56147e-48	1.22948e-10
				18D040KID_	18D143CT_4
				18D288CT_5
				19ND79
				20ND74
				21ND054CT
				21ND071CT
				21ND216_CE
				21RI09_7
				21RI47_20
				21RI85_43
				22ND044
				22ND100_41
				22ND120
				22ND236tra
				22ND57_KID
				22ND96
				22ND99_53

## Sheet: S
Recombination events	In Recombinant Sequence		Recombinant Sequence(s)	Minor Parental Sequence(s)	Major Parental Sequence(s)	Detection Methods
	Begin	End				RDP	GENECONV	Bootscan	Maxchi	Chimaera	SiSscan	3Seq
S_1	16714	20774	20ND27	18D143CT_4	20ND066AD6	6.16017e-256	4.96784e-228	5.42639e-126	1.03072e-67	8.98109e-67	3.73539e-94	3.68843e-10
				13AQ22TRA_	21L103F
				18D042CT_3	21ND190_ct
				20AD042Tra
				20ND08
				20ND12
				20ND42
				21ND034CT
				21ND066CT
				21ND144_ct
				21RI109
				21RI56_24
				21RI79_31
				22ND039
				22ND102_42
				22ND114_46
				22ND259CT
				22ND263CT
				22ND370CT
				KU900742.1
				KU900738.1
				HM245923.1
				KF853202.1
				JF732903.1
S_2	19386	24789	13AD24CT_C	13AQ22TRA_	VNUA_IBV_1	5.84647e-31	1.81866e-203	NS	1.45862e-34	4.64432e-57	1.36406e-82	2.45895e-10
				18D041CT_3	AY514485.1
				18D042CT_3
				18D049CT_3
				18D101CT_3
				18D143CT_4
				19ND157
				19ND16
				19ND178
				19ND79
				20AD042Tra
				20ND08
				20ND12
				20ND42
				21L087OP2
				21ND011CT
				21ND034CT
				21ND066CT
				21ND144_ct
				21RI07_6
				21RI109
				21RI35
				21RI56_24
				21RI77_29
				21RI79_31
				22ND039
				22ND102_42
				22ND114_46
				22ND259CT
				22ND263CT
				22ND370CT
				KU900742.1
				KU900738.1
				KF853202.1
				JX840411.1
S_3	19178	23760	UPM119	QXE	KF377577.1	1.02344e-182	9.54376e-185	1.48339e-140	1.77946e-22	4.3367e-35	1.77713e-74	1.22948e-10
				18D040KID_
				18D288CT_5
				19ND178
				19ND181_CE
				19ND70
				19ND79
				20AD049CE2
				20_CL
				20ND026CT
				20ND039CT
				20ND044AD4
				20ND74
				21L034CL
				21L050F
				21L081F
				21L186F
				21ND011CT
				21ND046CT
				21ND048CT
				21ND054CT
				21ND056CT
				21ND060CT
				21ND061CT
				21ND069CT
				21ND071CT
				21ND074CT
				21ND081CT
				21ND085CT
				21ND086CT
				21ND087CT
				21ND191_ct
				21ND196_ki
				21ND216_CE
				21ND32_ct
				21RI06_5
				21RI07_6
				21RI09_7
				21RI100
				21RI105
				21RI107
				21RI108
				21RI16_9
				21RI18_10
				21RI20_11
				21RI22_12
				21RI25
				21RI30_14
				21RI34_15
				21RI35
				21RI40_17
				21RI41_18
				21RI46_19
				21RI47_20
				21RI48_21
				21RI51_22
				21RI52_23
				21RI68_26
				21RI71_27
				21RI77_29
				21RI78_30
				21RI85_43
				21RI99_32
				22ND044
				22ND100_41
				22ND116CT_
				22ND118CT_
				22ND120
				22ND236tra
				22ND57_KID
				22ND81_51
				22ND96
				22ND99_53
S_4	19337	23427	22ND06_tra	HM245924.1	20ND066AD6	5.41789e-214	8.19718e-204	0.000401174	1.01436e-36	1.9634e-48	6.50159e-75	3.68843e-10
				JF893452.2
				EU714029.1
S_5	19324	21052	KF411041.1	JF893452.2	QXE	4.6714e-132	6.85454e-135	NS	5.57757e-30	2.11384e-31	4.2978e-41	7.37686e-10
				EU714029.1	21L087OP2
					21ND071CT

## Sheet: M
Recombination events	In Recombinant Sequence		Recombinant Sequence(s)	Minor Parental Sequence(s)	Major Parental Sequence(s)	Detection Methods
	Begin	End				RDP	GENECONV	Bootscan	Maxchi	Chimaera	SiSscan	3Seq
M_1	22969	24384	21RI14_8	Kr_D75_05	21RI07_6	2.25238e-183	1.669e-181	6.26807e-158	1.27754e-28	3.22259e-28	3.48336e-32	8.60634e-10
				21ND18_ct	13AQ22TRA_
				21ND53_ct	18D040KID_
				21RI75_28	18D288CT_5
				22ND253CT	19ND181_CE
				D85_06_CE	19ND70
				Kr_107_04	19ND79
				Kr_154_04	20AD042Tra
				Kr_180_04_	20AD049CE2
				Kr_48_4_05	20_CL
				IBV_AVR1_1	20ND026CT
					20ND039CT
					20ND044AD4
					20ND08
					20ND12
					20ND42
					20ND74
					21L034CL
					21L050F
					21L081F
					21L186F
					21ND011CT
					21ND046CT
					21ND048CT
					21ND054CT
					21ND056CT
					21ND060CT
					21ND061CT
					21ND066CT
					21ND069CT
					21ND071CT
					21ND081CT
					21ND144_ct
					21ND191_ct
					21ND216_CE
					21ND32_ct
					21RI06_5
					21RI09_7
					21RI105
					21RI108
					21RI109
					21RI16_9
					21RI18_10
					21RI20_11
					21RI22_12
					21RI25
					21RI30_14
					21RI34_15
					21RI35
					21RI47_20
					21RI48_21
					21RI68_26
					21RI71_27
					21RI77_29
					21RI78_30
					21RI79_31
					21RI85_43
					21RI99_32
					22ND039
					22ND044
					22ND100_41
					22ND102_42
					22ND114_46
					22ND118CT_
					22ND120
					22ND236tra
					22ND259CT
					22ND263CT
					22ND370CT
					22ND57_KID
					22ND96
					22ND99_53
					KU900742.1
					KU900738.1
					KF853202.1
M_2	20300	21405	20ND71	21ND18_ct	QXE	9.0985e-128	3.87781e-126	NS	1.10163e-27	9.7214e-28	1.67569e-33	6.14738e-10
				20ND066AD6	21ND071CT
				21ND53_ct
				21RI75_28
				D85_06_CE
				Kr_107_04
				Kr_154_04
				Kr_180_04_
				Kr_D75_05
				IBV_AVR1_1

## Sheet: N
Recombination events	In Recombinant Sequence		Recombinant Sequence(s)	Minor Parental Sequence(s)	Major Parental Sequence(s)	Detection Methods
	Begin	End				RDP	GENECONV	Bootscan	Maxchi	Chimaera	SiSscan	3Seq
N_1	24376	26005	21RI107	Kr_D75_05	21ND060CT	5.2829e-203	6.54587e-201	3.27917e-194	3.58119e-29	3.61018e-29	3.17235e-34	8.60634e-10
				20L215F	19ND181_CE
				20L216F	19ND70
				21L103F	19ND79
				21ND164_ct	20ND026CT
				21ND18_ct	20ND039CT
				21ND53_ct	20ND74
				21RI75_28	21L034CL
				D85_06_CE	21L050F
				Kr_107_04	21ND011CT
				Kr_180_04_	21ND046CT
				Kr_Q45_05_	21ND048CT
				IBV_AVR1_1	21ND054CT
					21ND056CT
					21ND061CT
					21ND069CT
					21ND081CT
					21ND191_ct
					21ND216_CE
					21ND32_ct
					21RI07_6
					21RI09_7
					21RI105
					21RI108
					21RI14_8
					21RI16_9
					21RI18_10
					21RI20_11
					21RI22_12
					21RI25
					21RI30_14
					21RI35
					21RI47_20
					21RI48_21
					21RI68_26
					21RI77_29
					21RI78_30
					21RI99_32
					22ND039
					22ND044
					22ND100_41
					22ND102_42
					22ND114_46
					22ND118CT_
					22ND259CT
					22ND263CT
					22ND57_KID
					22ND96
					22ND99_53
N_2	24166	25963	HQ848267.1	HM245924.1	21RI20_11	3.08763e-41	2.02459e-64	NS	1.03756e-24	1.64369e-27	2.53225e-31	2.45895e-10
				JF893452.2	19ND181_CE
					19ND70
					20AD042Tra
					20_CL
					20ND026CT
					20ND039CT
					20ND08
					20ND12
					20ND42
					20ND74
					21L034CL
					21L050F
					21L186F
					21ND046CT
					21ND048CT
					21ND054CT
					21ND056CT
					21ND060CT
					21ND061CT
					21ND069CT
					21ND071CT
					21ND081CT
					21ND191_ct
					21ND196_ki
					21ND216_CE
					21ND32_ct
					21RI06_5
					21RI09_7
					21RI100
					21RI105
					21RI108
					21RI14_8
					21RI16_9
					21RI18_10
					21RI22_12
					21RI25
					21RI30_14
					21RI34_15
					21RI47_20
					21RI48_21
					21RI56_24
					21RI68_26
					21RI71_27
					21RI78_30
					21RI99_32
					22ND044
					22ND100_41
					22ND118CT_
					22ND57_KID
					22ND96
					22ND99_53
					QXE
					KF411041.1
					HM245923.1
					KF853202.1
					JF732903.1
N_3	24188	25334	20ND044AD4	20ND08	21RI102	5.76587e-44	3.52103e-39	3.05296e-43	5.08847e-19	8.59559e-20	1.99402e-30	1.22948e-10
				13AQ22TRA_	21ND164_ct
				19ND157
				20L235F
				20ND12
				20ND74
				21ND054CT
				21ND071CT
				21ND144_ct
				21ND216_CE
				21RI09_7
				21RI109
				21RI47_20
				21RI79_31
				21RI85_43
				22ND044
				22ND100_41
				22ND118CT_
				22ND120
				22ND57_KID
				22ND96
				22ND99_53
				KU900742.1
				KU900738.1
				HM245923.1
				KF853202.1
