# Supplementary material
Source: Research Square preprint supplement (doi:10.21203/rs.3.rs-8697740/v1)
Supplement: Supplementary file 2 [file bf4573e4f20bcc85813e0f1d.xlsx]

## Sheet: Sheet2
ID	Country	Year of isolation	Clade
IBV-RB86	South Korea	1986	GI-1
B4-CE	South Korea	1986	GI-15 (K-1)
IBV-R86	South Korea	1986	K-IIa
IBV-H120-1	Vaccine	1986	GI-1
EC91	South Korea	1991	GI-15 (K-1)
KM91-CE	South Korea	1991	K-IIa
Kr-31-03	South Korea	2003	K-IIa
Kr-354-03	South Korea	2003	K-IIb
Kr-342-03	South Korea	2003	K-IIb
Kr-379-03	South Korea	2003	K-IIb
Kr-343-03	South Korea	2003	K-IIb
Kr-343-03-	South Korea	2003	K-IIb
Kr-154-04	South Korea	2004	GI-15 (K-1)
Kr-180-04-	South Korea	2004	GI-15 (K-1)
Kr-107-04	South Korea	2004	GI-15 (K-1)
Kr-162-04	South Korea	2004	K-IIa
Kr-162-04-	South Korea	2004	K-IIa
Kr-10-04	South Korea	2004	K-IIa
Kr-48-4-05	South Korea	2005	GI-15 (K-1)
Kr-D75-05	South Korea	2005	GI-15 (K-1)
Kr-Q45-05-	South Korea	2005	GI-15 (K-1)
Kr-D62-05	South Korea	2005	K-IId (C4)
D85-06-CE	South Korea	2006	GI-15 (K-1)
Kr-62-3-06	South Korea	2006	K-IIc
Kr-Q43-06	South Korea	2006	K-IIc
Kr-Q35-06	South Korea	2006	K-IIb
Kr-Q35-06-	South Korea	2006	K-IIb
IBV-K2-2	Vaccine	2009	K-IIa
12AD21TRA-	South Korea	2012	K-IId (C1)
13AD23TRA-	South Korea	2013	K-IIa
13AQ22TRA-	South Korea	2013	K-IId (C1)
13AD24CT-C	South Korea	2013	K-IId (C1)
13AD14TRA-	South Korea	2013	K-IId (C1)
VNUA-IBV-1	Vietnam	2014	Vietnam
UPM119	Malaysia	2015	K-IIe
IBS125	Malaysia	2015	K-IIe
IBS131	Malaysia	2015	K-IIe
IBS138	Malaysia	2015	K-IIe
IBS130	Malaysia	2015	K-IIe
IBS126	Malaysia	2015	K-IIe
IBS124	Malaysia	2015	K-IIe
Kr-D15-15-	South Korea	2015	20AD17
15D44CT-CE	South Korea	2015	K-IIa
IBV-AVR1-1 (AVR1/08)	Vaccine	2015	GI-15 (K-1)
IBS-332B	Malaysia	2016	Malaysian variant
16D88	South Korea	2016	K-IIa
17D53	South Korea	2017	K-IIb
18D108TRA-	South Korea	2018	K-IIa
18D22	South Korea	2018	K-IIb
18D042CT-3	South Korea	2018	K-IId (C1)
18D143CT-4	South Korea	2018	K-IId (C4)
18D288CT-5	South Korea	2018	K-IId (C4)
18D040KID-	South Korea	2018	K-IId (C4)
18D041CT-3	South Korea	2018	K-IId (C4)
18D101CT-3	South Korea	2018	K-IId (C4)
18D049CT-3	South Korea	2018	K-IId (C4)
2-321QXIB0 (K40/09)	Vaccine	2018	K-IIc
19ND091	South Korea	2019	K-IIa
19ND157	South Korea	2019	K-IId (C4)
19ND16	South Korea	2019	K-IId (C4)
19ND79	South Korea	2019	K-IId (C5)
19ND178	South Korea	2019	K-IId (C5)
19ND70	South Korea	2019	K-IId (C5)
19ND181-CE	South Korea	2019	K-IId (C5)
UPM1429-20	Malaysia	2020	Malaysian variant
UPM1416	Malaysia	2020	Malaysian variant
UPM1371	Malaysia	2020	Malaysian variant
UPM1365-20	Malaysia	2020	Malaysian variant
20ND066AD6	South Korea	2020	20AD17
20AD17	South Korea	2020	20AD17
20L235F	South Korea	2020	GI-15 (K-1)
20ND044AD4	South Korea	2020	GI-15 (K-1)
20AD049CE2	South Korea	2020	GI-15 (K-1)
20L110F	South Korea	2020	GI-15 (K-1)
20L216F	South Korea	2020	GI-15 (K-1)
20L215F	South Korea	2020	GI-15 (K-1)
20ND41	South Korea	2020	K-IIc
20ND08	South Korea	2020	K-IId (C2)
20ND12	South Korea	2020	K-IId (C2)
20ND42	South Korea	2020	K-IId (C2)
20AD042Tra	South Korea	2020	K-IId (C2)
20ND27	South Korea	2020	K-IId (C4)
20ND026CT	South Korea	2020	K-IId (C5)
20L124CL	South Korea	2020	K-IId (C5)
20ND30	South Korea	2020	K-IId (C5)
20ND74	South Korea	2020	K-IId (C5)
20ND71	South Korea	2020	K-IId (C5)
20-CL	South Korea	2020	K-IId (C5)
20ND039CT	South Korea	2020	K-IId (C5)
21L350F	South Korea	2021	20AD17
21L068OPCE	South Korea	2021	20AD17
21L019FCE1	South Korea	2021	20AD17
21L088F	South Korea	2021	GI-15 (K-1)
21RI102	South Korea	2021	GI-15 (K-1)
21ND190-ct	South Korea	2021	GI-15 (K-1)
21ND164-ct	South Korea	2021	GI-15 (K-1)
21ND53-ct	South Korea	2021	GI-15 (K-1)
21RI75-28	South Korea	2021	GI-15 (K-1)
21ND194-tr	South Korea	2021	GI-15 (K-1)
21ND18-ct	South Korea	2021	GI-15 (K-1)
21L103F	South Korea	2021	GI-15 (K-1)
21L002CL	South Korea	2021	K-IIa
21ND028CT	South Korea	2021	K-IIa
21ND136-tr	South Korea	2021	K-IIa
21RI141-54	South Korea	2021	K-IIc
21ND19-Tra	South Korea	2021	K-IIc
21ND192-ct	South Korea	2021	K-IIc
21L087OP2	South Korea	2021	K-IId (C2)
21RI79-31	South Korea	2021	K-IId (C2)
21RI56-24	South Korea	2021	K-IId (C2)
21ND034CT	South Korea	2021	K-IId (C2)
21RI109	South Korea	2021	K-IId (C2)
21ND066CT	South Korea	2021	K-IId (C2)
21ND144-ct	South Korea	2021	K-IId (C2)
21RI41-18	South Korea	2021	K-IId (C3)
21RI40-17	South Korea	2021	K-IId (C3)
21RI52-23	South Korea	2021	K-IId (C3)
21RI51-22	South Korea	2021	K-IId (C3)
21ND085CT	South Korea	2021	K-IId (C3)
21RI46-19	South Korea	2021	K-IId (C3)
21ND196-ki	South Korea	2021	K-IId (C3)
21ND086CT	South Korea	2021	K-IId (C3)
21ND074CT	South Korea	2021	K-IId (C3)
21RI100	South Korea	2021	K-IId (C3)
21ND087CT	South Korea	2021	K-IId (C3)
21RI35	South Korea	2021	K-IId (C3)
21ND061CT	South Korea	2021	K-IId (C3)
21ND152-CE	South Korea	2021	K-IId (C4)
21ND079CT	South Korea	2021	K-IId (C4)
21ND078CT	South Korea	2021	K-IId (C4)
21RI06-5	South Korea	2021	K-IId (C5)
21L186F	South Korea	2021	K-IId (C5)
21RI77-29	South Korea	2021	K-IId (C5)
21RI116	South Korea	2021	K-IId (C5)
21L145F	South Korea	2021	K-IId (C5)
21RI30-14	South Korea	2021	K-IId (C5)
21RI99-32	South Korea	2021	K-IId (C5)
21ND081CT	South Korea	2021	K-IId (C5)
21ND216-CE	South Korea	2021	K-IId (C5)
21ND071CT	South Korea	2021	K-IId (C5)
21RI47-20	South Korea	2021	K-IId (C5)
21RI105	South Korea	2021	K-IId (C5)
21RI07-6	South Korea	2021	K-IId (C5)
21ND011CT	South Korea	2021	K-IId (C5)
21RI20-11	South Korea	2021	K-IId (C5)
21L034CL	South Korea	2021	K-IId (C5)
21RI16-9	South Korea	2021	K-IId (C5)
21RI71-27	South Korea	2021	K-IId (C5)
21RI48-21	South Korea	2021	K-IId (C5)
21RI22-12	South Korea	2021	K-IId (C5)
21ND056CT	South Korea	2021	K-IId (C5)
21RI14-8	South Korea	2021	K-IId (C5)
21RI108	South Korea	2021	K-IId (C5)
21ND191-ct	South Korea	2021	K-IId (C5)
21RI78-30	South Korea	2021	K-IId (C5)
21RI68-26	South Korea	2021	K-IId (C5)
21ND048CT	South Korea	2021	K-IId (C5)
21ND069CT	South Korea	2021	K-IId (C5)
21RI18-10	South Korea	2021	K-IId (C5)
21ND046CT	South Korea	2021	K-IId (C5)
21RI107	South Korea	2021	K-IId (C5)
21ND060CT	South Korea	2021	K-IId (C5)
21L050F	South Korea	2021	K-IId (C5)
21RI25	South Korea	2021	K-IId (C5)
21ND32-ct	South Korea	2021	K-IId (C5)
21RI34-15	South Korea	2021	K-IId (C5)
21L081F	South Korea	2021	K-IId (C5)
21RI09-7	South Korea	2021	K-IId (C5)
21RI85-43	South Korea	2021	K-IId (C5)
21ND054CT	South Korea	2021	K-IId (C5)
22ND307TRA	South Korea	2022	20AD17
22ND253CT	South Korea	2022	GI-15 (K-1)
22ND57-TRA	South Korea	2022	K-IIa
22ND03-tra	South Korea	2022	K-IIa
22ND09-ct	South Korea	2022	K-IIa
22ND28-tra	South Korea	2022	K-IIa
22ND06-tra	South Korea	2022	K-IIa
22ND238tra	South Korea	2022	K-IIc
22ND20-ct	South Korea	2022	K-IIc
22ND119CT	South Korea	2022	K-IIc
22ND81-51	South Korea	2022	K-IId (C2)
22ND116CT-	South Korea	2022	K-IId (C2)
22ND102-42	South Korea	2022	K-IId (C2)
22ND039	South Korea	2022	K-IId (C2)
22ND263CT	South Korea	2022	K-IId (C2)
22ND114-46	South Korea	2022	K-IId (C2)
22ND370CT	South Korea	2022	K-IId (C2)
22ND259CT	South Korea	2022	K-IId (C2)
22ND96	South Korea	2022	K-IId (C3)
22ND075KID	South Korea	2022	K-IId (C4)
22ND99-53	South Korea	2022	K-IId (C5)
22ND100-41	South Korea	2022	K-IId (C5)
22ND120	South Korea	2022	K-IId (C5)
22ND236tra	South Korea	2022	K-IId (C5)
22ND044	South Korea	2022	K-IId (C5)
22ND57-KID	South Korea	2022	K-IId (C5)
22ND118CT-	South Korea	2022	K-IId (C5)
QXE	Vaccine	2022	K-IIe
